# Supplementary material for: Novel electro-fluorescent materials with hybridized local and charge-transfer (HLCT) excited state for highly efficient non-doped pure blue OLEDs
Source: Royal Society of Chemistry journal article supplement (doi:10.1039/d2qo02039d), 2023-01-01
Supplement: d2qo02039d1.pdf [file d2qo02039d1.pdf]

## Supporting Information

### **Novel Electro-fluorescent Materials with Hybrid Local and Charge-transfer (HLCT) State for Highly Efficient Nondoped Pure Blue OLEDs**

Mizhen Sun,<sup>a</sup> Mingming Zhang,<sup>b</sup> Yannan Zhou,<sup>a</sup> Mingliang Xie,<sup>a</sup> Lizhi Chu,<sup>a</sup> Xin Wang,<sup>a</sup> Qikun Sun,<sup>a</sup> Fengjia Liu,<sup>a</sup> Wenjun Yang,<sup>a</sup> and Shanfeng Xue<sup>a\*</sup>

<sup>a</sup> Key Laboratory of Rubber-Plastics of the Ministry of Education, School of Polymer Science & Engineering, Qingdao University of Science and Technology, 53-Zhengzhou Road, Qingdao 266042, China.

\*Corresponding author. E-mail: [sfxue@qust.edu.cn](mailto:sfxue@qust.edu.cn);

<sup>b</sup> Key Laboratory of Eco-Chemical Engineering, Ministry of Education, College of Chemistry and Molecular Engineering, Qingdao University of Science & Technology, Qingdao, China.

### **Contents**

**SI-1 Calculation formula.**

**SI-2 Supplementary figures**

**SI-3 Supplementary tables**

## Contents

### SI-1 Calculation formula.

**Lippert-Mataga model:** The influence of solvent environment on the optical property of our compounds can be understood using the Lippert-Mataga equation, a model that describes the interactions between the solvent and the dipole moment of solute:

$$hc(\nu_a - \nu_f) = hc(\nu_a^0 - \nu_f^0) - \frac{2(\mu_e - \mu_g)^2}{a^3} f(\epsilon, n) \quad (1)$$

where  $f$  is the orientational polarizability of solvents,  $\mu_e$  is the dipole moment of excited state,  $\mu_g$  is the dipole moment of ground state;  $a$  is the solvent cavity (Onsager) radius,  $\epsilon$  and  $n$  are the solvent dielectric and the solvent refractive index, respectively.

### The EQE measurement method for the non-doped device:

$$EQE = \frac{\pi \cdot L \cdot e}{683 \cdot I \cdot h \cdot c} \cdot \frac{\int_{380}^{780} I(\lambda) \cdot \lambda \cdot d\lambda}{\int_{380}^{780} I(\lambda) \cdot K(\lambda) \cdot d\lambda} \quad \text{Formula S1}$$

where  $L$  ( $\text{cd m}^{-2}$ ) is the total luminance of device,  $I(A)$  is the current flowing into the EL device,  $\lambda$  (nm) is EL wavelength,  $I(\lambda)$  is the relative EL intensity at each wavelength and obtained by measuring the EL spectrum,  $K(\lambda)$  is the Commission International de L'Eclairage chromaticity (CIE) standard photopic efficiency function,  $e$  is the charge of an electron,  $h$  is the Planck's constant,  $c$  is the velocity of light.

### S I -2 Supporting Figures

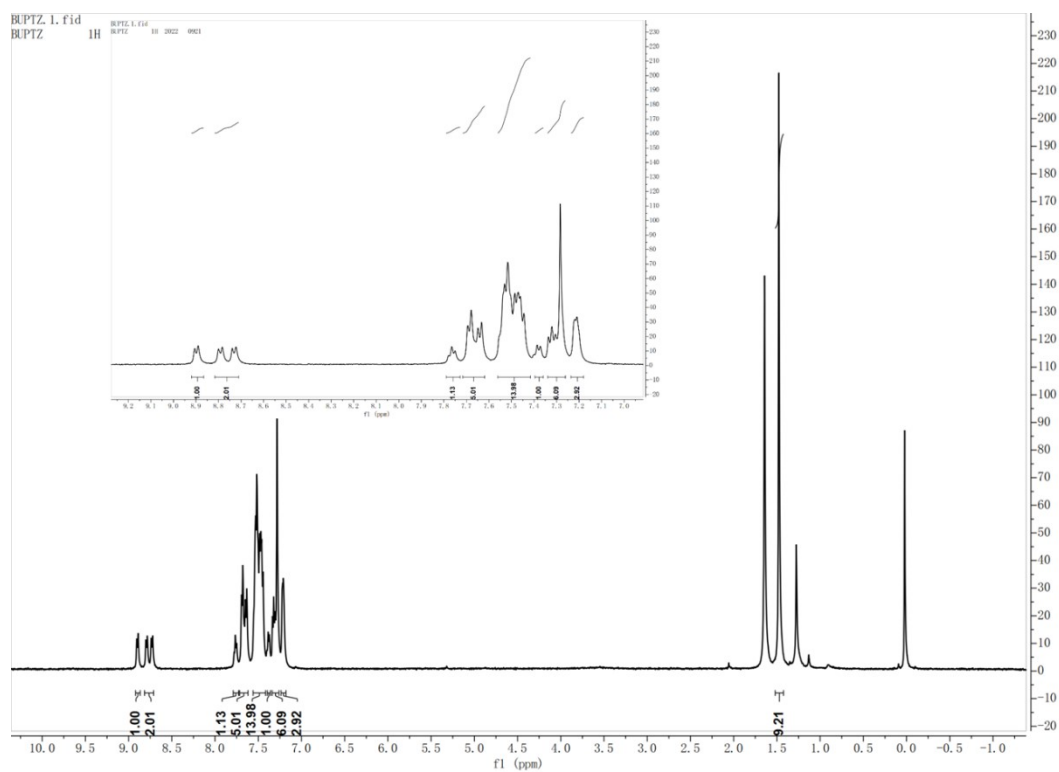

**Fig. S1** <sup>1</sup>H-NMR Spectrum of *t*BuPPITZ in CDCl<sub>3</sub>.

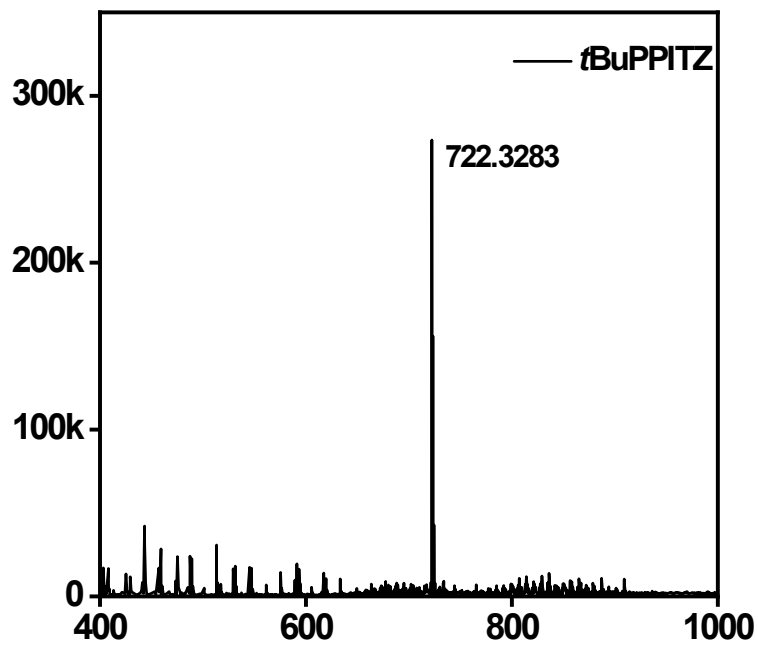

**Fig. S2** Mass Spectrum (M+H) of *t*BuPPITZ.

**Fig. S3** <sup>1</sup>H-NMR Spectrum of PPITZCN in CDCl<sub>3</sub>.

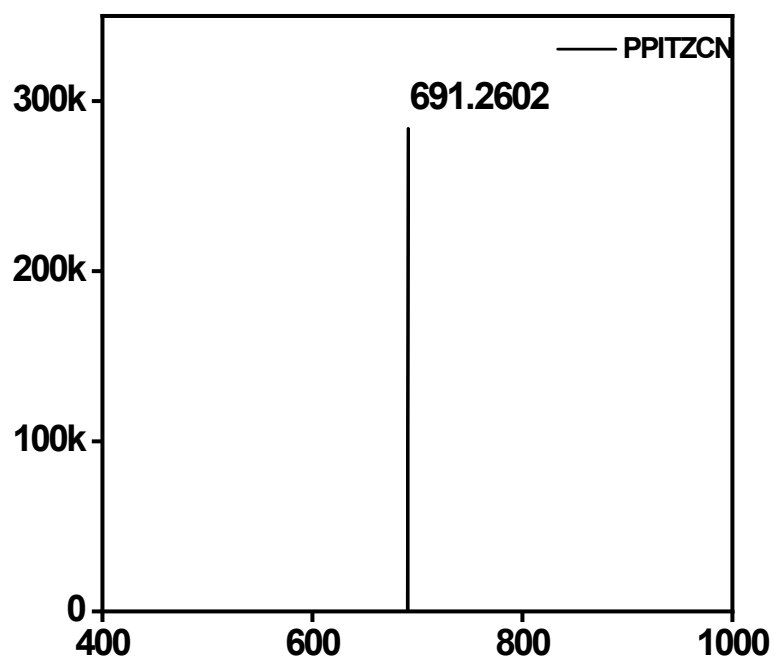

Fig S4. Mass Spectrum (M+H) of PPITZCN.

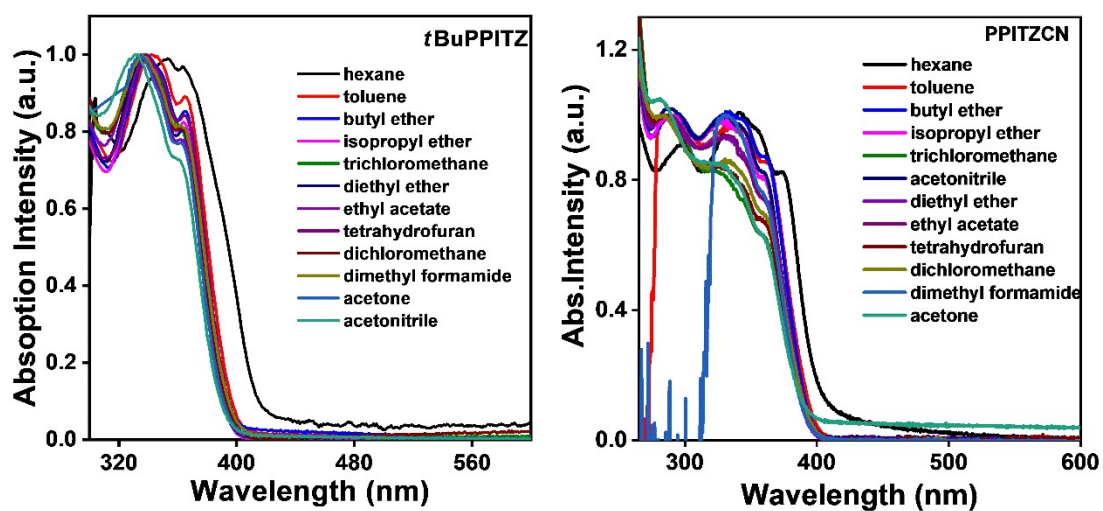

Fig S5. Absorption spectra of *t*BuPPITZ and PPITZCN in different polar solvents.

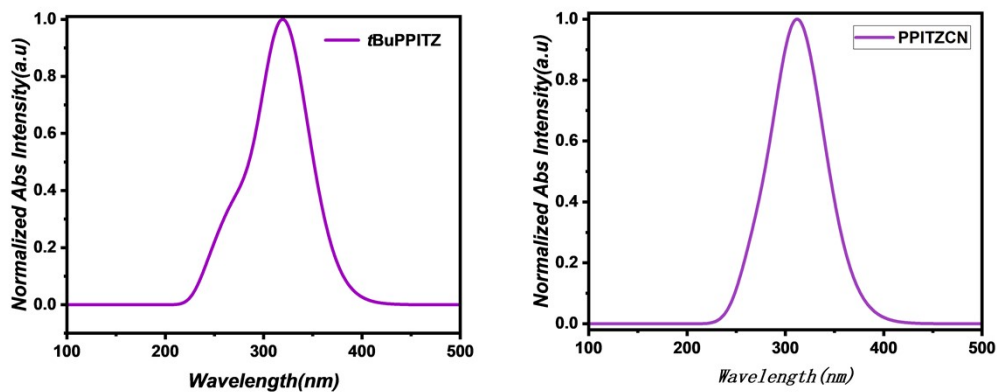

**Fig. S6** The calculated absorption spectra of *t*BuPPITZ and PPITZCN.

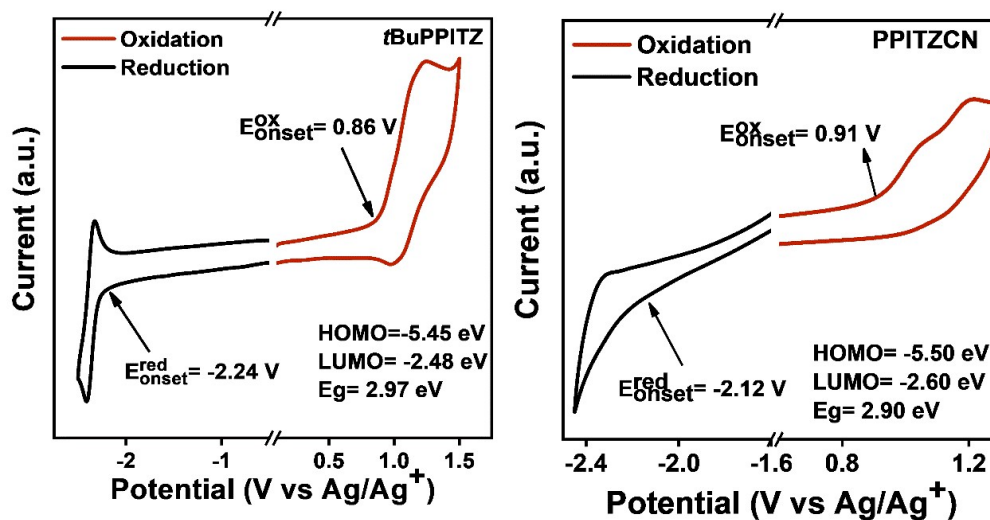

**Fig. S7** Electrochemical spectrogram of *t*BuPPITZ and PPITZCN.

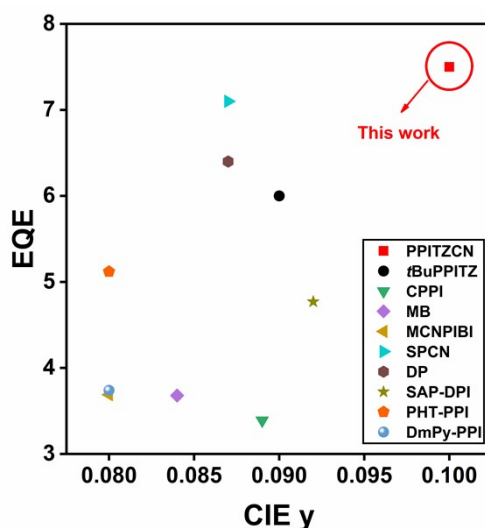

**Fig. S8** The non-doped devices performance of blue-HLCT emitters based on PPI with  $0.08 \leq \text{CIE}_y \leq 0.10$  and  $\text{EL} \leq 450 \text{ nm}$  in the past three years.

### SI-3 Supporting tables

**Table S1.** Absorption and emission peaks in different solvents with different polarities of *t*BuPPITZ and PPITZCN.

|  | <i>t</i> BuPPITZ | PPITZCN |
|--|------------------|---------|
|  |                  |         |

|                 | $\lambda_{\text{exmax}}/\lambda_{\text{emmax}}$ [nm] | $\lambda_{\text{exmax}}/\lambda_{\text{emmax}}$ [nm] |
|-----------------|------------------------------------------------------|------------------------------------------------------|
| Hexane          | 363/400                                              | 360/397                                              |
| Butylether      | 364/404                                              | 360/404                                              |
| Isopropylether  | 364/405                                              | 360/405                                              |
| Chloroform      | 364/418                                              | 362/429                                              |
| Ethylether      | 365/408                                              | 359/405                                              |
| Ethylacetate    | 363/420                                              | 358/406                                              |
| THF             | 364/419                                              | 363/421                                              |
| Dichloromethane | 363/434                                              | 361/424                                              |
| DMF             | 365/441                                              | 360/430                                              |
| Acetone         | 362/433                                              | 360/440                                              |
| Acetonitrile    | 361/440                                              | 359/439                                              |

**Table S2.**  $\Phi_{\text{PL}}$  of *t*BuPPITZ and PPITZCN in different solvents with different polarities and in neat film.

|                 | <i>t</i> BuPPITZ | PPITZCN |
|-----------------|------------------|---------|
| hexane          | 75%              | 49%     |
| Isopropyl ether | 99%              | 66%     |
| THF             | 99%              | 75%     |
| acetonitrile    | 89%              | 51%     |
| film            | 72%              | 69%     |

**Table S3.** Relevant solvents and corresponding detailed data used to draw Stokes curve.

|                | <i>t</i> BuPPITZ                                                                                    | PPITZCN                                                                                             |
|----------------|-----------------------------------------------------------------------------------------------------|-----------------------------------------------------------------------------------------------------|
|                | polarization factor ( $f$ )/ $\lambda_{\text{exmax}}/\lambda_{\text{emmax}}$ [nm]/<br>stockes shift | polarization factor ( $f$ )/ $\lambda_{\text{exmax}}/\lambda_{\text{emmax}}$ [nm]/<br>stockes shift |
| Hexane         | 0.0012/363/400/2548.209366                                                                          | 0.0012/360/397/2713.265932                                                                          |
| Butylether     | 0.096/364/404/2720.052225                                                                           | 0.096/360/404/3025.30253                                                                            |
| Isopropylether | 0.145/364/405/2781.169448                                                                           | 0.145/360/405/3086.419753                                                                           |
| Ethylether     | 0.167/365/408/2887.456352                                                                           | 0.167/359/405/3163.795179                                                                           |
| Ethylacetate   | 0.2/363/420/3738.685557                                                                             | 0.2/358/406/3302.419022                                                                             |
| THF            | 0.21/364/419/3606.179024                                                                            | 0.21/363/421/3795.240245                                                                            |
| Acetone        | 0.284/362/433/4529.621171                                                                           | 0.284/360/440/5050.505051                                                                           |
| Acetonitrile   | 0.305/361/440/4973.558298                                                                           | 0.305/359/439/5076.109923                                                                           |

**Table S4.** Detailed energy level data of *t*BuPPITZ and PPITZCN.

| S/T <sup>(a)</sup> [eV] | <i>t</i> BuPPITZ | PPITZCN     |
|-------------------------|------------------|-------------|
| S1/T1                   | 3.583/3.035      | 3.765/3.052 |
| S2/T2                   | 4.125/3.352      | 3.966/3.344 |
| S3/T3                   | 4.438/3.609      | 4.167/3.629 |
| S4/T4                   | 4.591/3.708      | 4.469/3.684 |
| S5/T5                   | 4.669/3.811      | 4.508/3.744 |
| S6/T6                   | 4.819/3.931      | 4.685/3.808 |
| S7/T7                   | 4.88/4.142       | 4.704/3.931 |
| S8/T8                   | 4.942/4.18       | 4.864/3.971 |
| S9/T9                   | 4.979/4.207      | 4.926/4.179 |
| S10/T10                 | 5.051/4.255      | 5.021/4.215 |

<sup>(a)</sup> Single excited state/Triple excited state (S/T) energy levels.

**Table S5.** The non-doped devices performance of blue emitters based on PPI with  $0.08 \leq \text{CIE}_y \leq 0.10$  and  $\lambda_{\text{EL}} \leq 450$  nm in the past three years.

| Emitters               | $V_{\text{on}}$ [V] | PE [lm/W] | $\lambda_{\text{EL}}$ [nm] | $\text{EQE}_{\text{max}}$ [%] | CIE (x, y)     | Ref.             |
|------------------------|---------------------|-----------|----------------------------|-------------------------------|----------------|------------------|
| <b><i>t</i>BuPPITZ</b> | 4.4                 | 2.35      | 436                        | 6.0                           | (0.16, 0.09)   | <b>This work</b> |
| <b>PPITZCN</b>         | 5.0                 | 3.01      | 448                        | 7.5                           | (0.16, 0.10)   | <b>This work</b> |
| CPPI                   | 3.2                 | 2.44      | 438                        | 3.39                          | (0.157, 0.089) | [1]              |
| MB                     | 2.9                 |           | 440                        | 3.68                          | (0.157, 0.084) | [2]              |
| MCNPIBI                | 3.8                 | 0.5       | 441                        | 3.69                          | (0.15, 0.08)   | [3]              |
| SPCN                   | 3.5                 | 4.6       | 444                        | 7.1                           | (0.154, 0.087) | [4]              |
| DP                     | 2.9                 | 4.8       | 436                        | 6.4                           | (0.153, 0.087) | [5]              |
| SAF-DPI                | 2.8                 | 4.39      | 432                        | 4.77                          | (0.154, 0.092) | [6]              |
| PHT-PPI                | 3.0                 | 3.25      | 448                        | 5.12                          | (0.15, 0.08)   | [7]              |
| DmPy-PPI               | 3.1                 | 1.97      | 437                        | 3.74                          | (0.15, 0.08)   | [8]              |

- 1 T. Sudyoadsuk, S. Petdee, P. Chasing, P. Therdkatanyuphong, C. Kaiyasuan, W. Waengdongbung, S. Namuangruk and V. Promarak, A solution-processable hybridized local and charge-transfer (HLCT) phenanthroimidazole as a deep-blue emitter for efficient solution-processed non-doped electroluminescence device, *Dyes Pigm*, 2021, **195**, 109712.
- 2 T. Shan, Y. L. Liu, X. Y. Tang, Q. Bai, Y. Gao, Z. Gao, J. Y. Li, J. Deng, B. Yang, P. Lu and Y. G. Ma, Highly Efficient Deep Blue Organic Light-Emitting



- Diodes Based on Imidazole: Significantly Enhanced Performance by Effective Energy Transfer with Negligible Efficiency Roll-off, *ACS Appl. Mater. Interfaces*, 2016, **8**, 28771–28779.
- 3 J. D. Girase, J. Tagare, S. Mukherjee, T. Chakrabarti, A. Perumal and S. Vaidyanathan, Efficient deep blue (CIE  $\sim 0.08$ ) fluorophore-based benzimidazole with hybridized local and charge transfer (HLCT) excited state for OLEDs, *Journal of Information Display*, 2022, **23**, 151-162.
  - 4 S. B. Xiao, X. Z. Tian, Y. Gao, H. C. Liu, C. J. Zhou, S. T. Zhang and B. Yang, Enhanced blue-emissive electroluminescence performance with rational donor substitution *Dyes Pigm*, 2022, **204**, 110451.
  - 5 S. B. Xiao, Y. Gao, R. Z. Wang, H. C. Liu, W. J. Li, C. J. Zhou, S. F. Xue, S. T. Zhang, B. Yang and Y. G. Ma, Highly efficient hybridized local and Charge-transfer (HLCT) Deep-blue electroluminescence with excellent molecular horizontal orientation, *Chem. Eng. J*, 2022, **440**, 135911.
  - 6 C. Kaiyasuan, P. Chasing, P. Nalaoh, P. Wongkaew, T. Sudyoasuk, K. Kongpatpanich and V. Promarak, Twisted Phenanthro[9,10-d]imidazole Derivatives as Non-doped Emitters for Efficient Electroluminescent Devices with Ultra-Deep Blue Emission and High Exciton Utilization Efficiency, *Chem Asian J*, 2021, **16**, 1–11.
  - 7 G. X. Yang, J. J. Zhu, S. S. Tang, H. J. Tan, X. H. J. X. Jian, X. H. Zheng, and Q. X. Tong, Effective Energy Transfer for Green, Orange, and Red PHOLEDs Based on Bipolar Deep-blue Emitter with Low Efficiency Roll-off at High

Brightness, *Advanced Photonics Research*, 2021, **2**, 2100031.

- 8 G. X. Yang, Y. W. Chen, J. J. Zhu, J. Y. Song, S. S. Tang, D. G. Ma and Q. X. Tong, Rational design of pyridine-containing emissive materials for high performance deep-blue organic light-emitting diodes with CIE<sub>y</sub> ~ 0.06, *Dyes Pigm*, 2021, **187**, 109088.
